# Supplementary material
Source: PubMed Central journal article supplement (PMC7871015)
Supplement: NIHMS1632664-supplement-1.pdf [file NIHMS1632664-supplement-1.pdf]

**SUPPLEMENTARY MATERIAL**

Supplemental Table 1. Type of landmarks visited by participants by category. Categories are modified from OpenStreetMap (Ramm, 2019; Haklay & Weber, 2008).

| <b>Category</b>  | <b>Landmark</b>                                                                                                                                                                                                                                                                                                                                                                                                                               |
|------------------|-----------------------------------------------------------------------------------------------------------------------------------------------------------------------------------------------------------------------------------------------------------------------------------------------------------------------------------------------------------------------------------------------------------------------------------------------|
| Accommodation    | camp site, caravan site, guesthouse, hotel, motel, shelter                                                                                                                                                                                                                                                                                                                                                                                    |
| Education        | college, kindergarten, school, university                                                                                                                                                                                                                                                                                                                                                                                                     |
| Food Shopping    | bakery, beverages, butcher, greengrocer, supermarket                                                                                                                                                                                                                                                                                                                                                                                          |
| Health           | dentist, doctors, hospital, pharmacy, veterinary                                                                                                                                                                                                                                                                                                                                                                                              |
| Leisure          | cinema, dog park, golf course, ice rink, nightclub, park, pitch, playground, sports centre, stadium, swimming pool, theatre, track                                                                                                                                                                                                                                                                                                            |
| Money            | atm, bank                                                                                                                                                                                                                                                                                                                                                                                                                                     |
| Place of worship | Buddhist, Christian, Jewish, Muslim                                                                                                                                                                                                                                                                                                                                                                                                           |
| Public           | arts center, community center, courthouse, fire station, graveyard, library, nursing home, police, post box, post office, prison, public building, recycling, recycling glass, recycling paper, town hall                                                                                                                                                                                                                                     |
| Restaurant       | bar, café, fast food, pub, restaurant                                                                                                                                                                                                                                                                                                                                                                                                         |
| Shopping other   | beauty shop, bicycle rental, bicycle shop, bookshop, car dealership, car rental, car wash, chemist, clothes, computer shop, convenience, department store, doityourself, florist, furniture shop, garden center, gift shop, hairdresser, jeweler, laundry, mall, mobile phone, shop, newsagent, optician, outdoor shop, shoe shop, sports shop, stationery, toy shop, travel agent, vending any, vending machine, vending parking, video shop |
| Tourism          | archaeological, artwork, attraction, battlefield, memorial, monument, museum, picnic site, ruins, tourist info, viewpoint, wayside cross, zoo                                                                                                                                                                                                                                                                                                 |

Supplemental Table 2. Means (standard deviations) of driving measures for each study period and significance of the Time X Year interaction for each measure.

|                                                   | <b>2019<br/>Pre</b> | <b>2019<br/>Post</b> | <b>2020<br/>Pre</b> | <b>2020<br/>Post</b> | <b>Unadjusted<br/>P Value</b> |
|---------------------------------------------------|---------------------|----------------------|---------------------|----------------------|-------------------------------|
| All participants                                  |                     |                      |                     |                      |                               |
| N                                                 | 214                 | 214                  | 214                 | 214                  |                               |
| Proportion of days driving,<br>mean (SD)          | 0.695<br>(0.225)    | 0.749<br>(0.228)     | 0.673<br>(0.267)    | 0.382<br>(0.292)     | <.001 <sup>a</sup>            |
| Trips/day, mean (SD)                              | 3.3 (1.7)           | 3.8 (2.0)            | 3.2 (1.9)           | 1.4 (1.4)            | <.001 <sup>a</sup>            |
| Participants driving at all during<br>each period |                     |                      |                     |                      |                               |
| N                                                 | 212                 | 211                  | 205                 | 173                  |                               |
| Speed/trip, mean (SD),<br>miles/hour              | 25.4<br>(5.0)       | 25.5<br>(5.2)        | 25.5<br>(5.1)       | 24.8<br>(5.7)        | <.001 <sup>a</sup>            |
| Miles/trip, mean (SD), miles                      | 7.1 (4.5)           | 7.4 (4.6)            | 6.9 (4.0)           | 6.4 (4.9)            | .02 <sup>a</sup>              |
| Hard braking/trip, mean (SD)                      | 0.028<br>(0.046)    | 0.026<br>(0.031)     | 0.027<br>(0.044)    | 0.025<br>(0.044)     | .86                           |
| Hard acceleration/trip, mean<br>(SD)              | 0.012<br>(0.029)    | 0.011<br>(0.022)     | 0.015<br>(0.046)    | 0.009<br>(0.019)     | .24                           |
| Overspeeding/trip, mean (SD)                      | 0.017<br>(0.022)    | 0.019<br>(0.024)     | 0.011<br>(0.017)    | 0.005<br>(0.011)     | <.001 <sup>a</sup>            |

<sup>a</sup> Significant using the Benjamini-Hochberg procedure and a false-discovery rate of .05.

Supplemental Table 3. Mean proportion (standard deviation) of days driving during each study period and significance of the Time X Year interaction.

|                      | <b>N</b> | <b>2019<br/>Pre</b> | <b>2019<br/>Post</b> | <b>2020<br/>Pre</b> | <b>2020<br/>Post</b> | <b>Unadjusted <i>P</i><br/>Value</b> |
|----------------------|----------|---------------------|----------------------|---------------------|----------------------|--------------------------------------|
| <b>Age group</b>     |          |                     |                      |                     |                      |                                      |
| 65 - 75.6 years      | 107      | 0.727<br>(0.213)    | 0.773<br>(0.222)     | 0.718<br>(0.252)    | 0.431<br>(0.289)     | .58                                  |
| ≥ 75.6 years         | 107      | 0.664<br>(0.233)    | 0.725<br>(0.232)     | 0.629<br>(0.279)    | 0.333<br>(0.287)     |                                      |
| <b>Gender</b>        |          |                     |                      |                     |                      |                                      |
| Women                | 100      | 0.710<br>(0.218)    | 0.780<br>(0.195)     | 0.668<br>(0.272)    | 0.338<br>(0.270)     | .02 <sup>a</sup>                     |
| Men                  | 114      | 0.683<br>(0.231)    | 0.722<br>(0.251)     | 0.678<br>(0.268)    | 0.421<br>(0.306)     |                                      |
| <b>Race</b>          |          |                     |                      |                     |                      |                                      |
| African American     | 33       | 0.713<br>(0.233)    | 0.729<br>(0.318)     | 0.631<br>(0.327)    | 0.344<br>(0.368)     | .40                                  |
| White                | 181      | 0.692<br>(0.224)    | 0.753<br>(0.208)     | 0.681<br>(0.257)    | 0.389<br>(0.276)     |                                      |
| <b>Obesity</b>       |          |                     |                      |                     |                      |                                      |
| No                   | 147      | 0.684<br>(0.237)    | 0.740<br>(0.227)     | 0.669<br>(0.270)    | 0.391<br>(0.288)     | .41                                  |
| Yes                  | 62       | 0.721<br>(0.195)    | 0.779<br>(0.217)     | 0.703<br>(0.260)    | 0.388<br>(0.297)     |                                      |
| <b>Hypertension</b>  |          |                     |                      |                     |                      |                                      |
| No                   | 94       | 0.712<br>(0.206)    | 0.742<br>(0.208)     | 0.692<br>(0.245)    | 0.376<br>(0.283)     | .96                                  |
| Yes                  | 120      | 0.682<br>(0.238)    | 0.754<br>(0.243)     | 0.658<br>(0.286)    | 0.387<br>(0.299)     |                                      |
| <b>Diabetes</b>      |          |                     |                      |                     |                      |                                      |
| No                   | 190      | 0.692<br>(0.223)    | 0.753<br>(0.212)     | 0.672<br>(0.266)    | 0.382<br>(0.288)     | .46                                  |
| Yes                  | 24       | 0.723<br>(0.242)    | 0.716<br>(0.331)     | 0.688<br>(0.297)    | 0.382<br>(0.329)     |                                      |
| <b>Heart Disease</b> |          |                     |                      |                     |                      |                                      |
| No                   | 191      | 0.693<br>(0.226)    | 0.754<br>(0.223)     | 0.673<br>(0.270)    | 0.381<br>(0.286)     | .19                                  |

|                                   |    |                  |                  |                  |                  |     |
|-----------------------------------|----|------------------|------------------|------------------|------------------|-----|
| Yes                               | 23 | 0.718<br>(0.216) | 0.703<br>(0.270) | 0.674<br>(0.262) | 0.396<br>(0.343) |     |
| Number of Medical Risk Conditions |    |                  |                  |                  |                  |     |
| 0                                 | 62 | 0.714<br>(0.208) | 0.760<br>(0.199) | 0.700<br>(0.224) | 0.392<br>(0.275) | .10 |
| 1                                 | 88 | 0.672<br>(0.240) | 0.724<br>(0.222) | 0.644<br>(0.290) | 0.378<br>(0.292) |     |
| 2                                 | 54 | 0.694<br>(0.227) | 0.789<br>(0.242) | 0.678<br>(0.295) | 0.361<br>(0.311) |     |
| 3 or more                         | 10 | 0.788<br>(0.161) | 0.690<br>(0.348) | 0.739<br>(0.152) | 0.471<br>(0.315) |     |

<sup>a</sup> Significant using the Benjamini-Hochberg procedure and a false-discovery rate of .05.

<sup>b</sup> N=5 participants were missing data for this variable.

Supplemental Table 4. Mean trips/day/person (standard deviation) driven during each study period and significance of the Time X Year interaction.

|                                          | <b>N</b> | <b>2019 Pre</b> | <b>2019 Post</b> | <b>2020 Pre</b> | <b>2020 Post</b> | <b>Unadjusted<br/>P Value</b> |
|------------------------------------------|----------|-----------------|------------------|-----------------|------------------|-------------------------------|
| <b>Age group</b>                         |          |                 |                  |                 |                  |                               |
| 65 - 75.6 years                          | 107      | 3.5 (1.7)       | 4.0 (2.1)        | 3.4 (1.9)       | 1.6 (1.5)        | .57                           |
| ≥ 75.6 years                             | 107      | 3.1 (1.7)       | 3.6 (1.9)        | 2.9 (1.9)       | 1.2 (1.3)        |                               |
| <b>Gender</b>                            |          |                 |                  |                 |                  |                               |
| Women                                    | 100      | 3.4 (1.7)       | 3.9 (1.9)        | 3.1 (1.8)       | 1.1 (1.2)        | .07                           |
| Men                                      | 114      | 3.3 (1.7)       | 3.7 (2.1)        | 3.2 (2.0)       | 1.6 (1.6)        |                               |
| <b>Race</b>                              |          |                 |                  |                 |                  |                               |
| African American                         | 33       | 3.9 (2.2)       | 4.3 (3.0)        | 3.2 (2.3)       | 1.5 (1.9)        | .70                           |
| White                                    | 181      | 3.2 (1.6)       | 3.7 (1.8)        | 3.2 (1.8)       | 1.4 (1.3)        |                               |
| <b>Obesity<sup>a</sup></b>               |          |                 |                  |                 |                  |                               |
| No                                       | 147      | 3.4 (1.9)       | 3.9 (2.1)        | 3.2 (2.1)       | 1.5 (1.5)        | .98                           |
| Yes                                      | 62       | 3.3 (1.3)       | 3.7 (1.7)        | 3.1 (1.5)       | 1.3 (1.3)        |                               |
| <b>Hypertension</b>                      |          |                 |                  |                 |                  |                               |
| No                                       | 94       | 3.4 (1.6)       | 3.7 (1.7)        | 3.2 (1.8)       | 1.3 (1.3)        | .57                           |
| Yes                                      | 120      | 3.3 (1.8)       | 3.9 (2.2)        | 3.1 (2.0)       | 1.4 (1.5)        |                               |
| <b>Diabetes</b>                          |          |                 |                  |                 |                  |                               |
| No                                       | 24       | 3.3 (1.5)       | 3.8 (2.4)        | 3.4 (2.2)       | 1.3 (1.5)        | 0.52                          |
| Yes                                      | 190      | 3.3 (1.7)       | 3.8 (2.0)        | 3.1 (1.9)       | 1.4 (1.4)        |                               |
| <b>Heart Disease</b>                     |          |                 |                  |                 |                  |                               |
| No                                       | 23       | 3.8 (2.0)       | 3.8 (2.4)        | 3.3 (2.3)       | 1.6 (2.0)        | .17                           |
| Yes                                      | 191      | 3.3 (1.7)       | 3.8 (2.0)        | 3.2 (1.9)       | 1.4 (1.3)        |                               |
| <b>Number of Medical Risk Conditions</b> |          |                 |                  |                 |                  |                               |
| 0                                        | 62       | 3.5 (1.7)       | 3.9 (1.9)        | 3.3 (1.8)       | 1.4 (1.3)        | .06                           |
| 1                                        | 88       | 3.1 (1.7)       | 3.5 (1.9)        | 2.9 (1.9)       | 1.3 (1.3)        |                               |
| 2                                        | 54       | 3.5 (1.8)       | 4.3 (2.3)        | 3.4 (2.2)       | 1.4 (1.7)        |                               |
| 3 or more                                | 10       | 3.4 (1.2)       | 3.3 (1.8)        | 3.1 (0.8)       | 1.4 (1.0)        |                               |

<sup>a</sup> N=5 participants were missing data for this variable.
